# Supplementary material for: A National Study of Longitudinal Consistency in ACGME Milestone Ratings by Clinical Competency Committees: Exploring an Aspect of Validity in the Assessment of Residents’ Competence
Source: PubMed Central journal article supplement — Acad Med. 2019 Jun 4;94(10):1522–31. doi: 10.1097/ACM.0000000000002820 (PMC6760653; doi:10.1097/acm.0000000000002820), 2019-06-04
Supplement: acm-94-1522-s001.pdf [file acm-94-1522-s001.pdf]

Supplemental digital content for Hamstra SJ, Yamazaki K, Barton MA, Santen SA, Beeson MS, Holmboe ES. A national study of longitudinal consistency in ACGME milestone ratings by clinical competency committees: Exploring an aspect of validity in the assessment of residents' competence. Acad Med.

## Supplemental Digital Appendix 1

### CCC Milestone Ratings of First-Year Residents (During Their First 6 Months of Training) Over Time for 178 ACGME-Accredited Diagnostic Radiology Programs, 2013–2016

| Subcompetency code | Intercept of milestone rating at time 0 (SE) | Slope of milestone ratings over time (SE) | Effect size ( $f^2$ ) for slope | Between-program intercept variance (SE) | Between-program intercept-slope covariance (SE) | Between-program slope variance (SE) | Residual variance (SE)     |
|--------------------|----------------------------------------------|-------------------------------------------|---------------------------------|-----------------------------------------|-------------------------------------------------|-------------------------------------|----------------------------|
| PC01               | 1.15 (0.04) <sup>c</sup>                     | -0.049 (0.014) <sup>c</sup>               | 0.02                            | 0.16 (0.03) <sup>c</sup>                | -0.015 (0.008)                                  | 0.015 (0.004) <sup>c</sup>          | 0.104 (0.008) <sup>c</sup> |
| PC02               | 0.99 (0.04) <sup>c</sup>                     | -0.035 (0.015) <sup>a</sup>               | 0.01                            | 0.16 (0.03) <sup>c</sup>                | -0.010 (0.009)                                  | 0.014 (0.004) <sup>c</sup>          | 0.123 (0.009) <sup>c</sup> |
| MK01               | 1.04 (0.03) <sup>c</sup>                     | -0.038 (0.014) <sup>b</sup>               | 0.01                            | 0.14 (0.02) <sup>c</sup>                | -0.006 (0.007)                                  | 0.013 (0.004) <sup>c</sup>          | 0.099 (0.007) <sup>c</sup> |
| MK02               | 1.13 (0.03) <sup>c</sup>                     | -0.044 (0.013) <sup>b</sup>               | 0.02                            | 0.13 (0.02) <sup>c</sup>                | -0.006 (0.007)                                  | 0.014 (0.004) <sup>c</sup>          | 0.090 (0.007) <sup>c</sup> |
| SBP01              | 1.06 (0.05) <sup>c</sup>                     | -0.048 (0.018) <sup>b</sup>               | 0.01                            | 0.22 (0.04) <sup>c</sup>                | -0.017 (0.013)                                  | 0.018 (0.007) <sup>b</sup>          | 0.198 (0.015) <sup>c</sup> |
| SBP02              | 1.01 (0.06) <sup>c</sup>                     | -0.037 (0.026)                            | 0.00                            | 0.36 (0.07) <sup>c</sup>                | -0.095 (0.026) <sup>c</sup>                     | 0.056 (0.014) <sup>c</sup>          | 0.331 (0.025) <sup>c</sup> |
| PBLI01             | 1.01 (0.04) <sup>c</sup>                     | -0.021 (0.015)                            | 0.00                            | 0.16 (0.03) <sup>c</sup>                | -0.009 (0.009)                                  | 0.016 (0.005) <sup>c</sup>          | 0.126 (0.009) <sup>c</sup> |
| PBLI02             | 1.03 (0.04) <sup>c</sup>                     | -0.024 (0.014)                            | 0.00                            | 0.20 (0.03) <sup>c</sup>                | -0.023 (0.009) <sup>a</sup>                     | 0.013 (0.004) <sup>b</sup>          | 0.120 (0.009) <sup>c</sup> |
| PBLI03             | 1.14 (0.06) <sup>c</sup>                     | -0.023 (0.022)                            | 0.00                            | 0.33 (0.06) <sup>c</sup>                | -0.040 (0.020)                                  | 0.023 (0.010) <sup>a</sup>          | 0.312 (0.023) <sup>c</sup> |
| PROF01             | 1.32 (0.04) <sup>c</sup>                     | -0.066 (0.015) <sup>c</sup>               | 0.03                            | 0.17 (0.03) <sup>c</sup>                | -0.018 (0.009) <sup>a</sup>                     | 0.015 (0.005) <sup>c</sup>          | 0.121 (0.009) <sup>c</sup> |
| ICS01              | 1.21 (0.04) <sup>c</sup>                     | -0.062 (0.014) <sup>c</sup>               | 0.03                            | 0.16 (0.03) <sup>c</sup>                | -0.011 (0.008)                                  | 0.011 (0.004) <sup>b</sup>          | 0.114 (0.009) <sup>c</sup> |
| ICS02              | 1.22 (0.04) <sup>c</sup>                     | -0.056 (0.014) <sup>c</sup>               | 0.02                            | 0.19 (0.03) <sup>c</sup>                | -0.025 (0.008) <sup>b</sup>                     | 0.017 (0.004) <sup>c</sup>          | 0.093 (0.007) <sup>c</sup> |

Abbreviations: CCC indicates clinical competency committee; ACGME, Accreditation Council for Graduate Medical Education; time 0, December 2013; SE, standard error; PC, patient care; MK, medical knowledge; SBP, systems-based practice; PBLI, practice-based learning and improvement; PROF, professionalism; ICS, interpersonal and communication skills.

<sup>a</sup> $P < .05$ .

<sup>b</sup> $P < .01$ .

<sup>c</sup> $P < .001$ .

Supplemental digital content for Hamstra SJ, Yamazaki K, Barton MA, Santen SA, Beeson MS, Holmboe ES. A national study of longitudinal consistency in ACGME milestone ratings by clinical competency committees: Exploring an aspect of validity in the assessment of residents' competence. Acad Med.

## Supplemental Digital Appendix 2

### CCC Milestone Ratings of First-Year Residents (During Their First 6 Months of Training) Over Time for 118 ACGME-Accredited Urology Programs, 2013–2016

| Subcompetency code | Intercept of milestone rating at time 0 (SE) | Slope of milestone ratings over time (SE) | Effect size ( $f^2$ ) for slope | Between-program intercept variance (SE) | Between-program intercept-slope covariance (SE) | Between-program slope variance (SE) | Residual variance (SE)     |
|--------------------|----------------------------------------------|-------------------------------------------|---------------------------------|-----------------------------------------|-------------------------------------------------|-------------------------------------|----------------------------|
| SBP01              | 2.30 (0.06) <sup>c</sup>                     | -0.047 (0.023) <sup>a</sup>               | 0.02                            | 0.333 (0.063) <sup>c</sup>              | -0.031 (0.019)                                  | 0.023 (0.009) <sup>b</sup>          | 0.204 (0.019) <sup>c</sup> |
| SBP02              | 2.03 (0.06) <sup>c</sup>                     | -0.032 (0.024)                            | 0.00                            | 0.347 (0.064) <sup>c</sup>              | -0.044 (0.020) <sup>a</sup>                     | 0.029 (0.009) <sup>b</sup>          | 0.193 (0.018) <sup>c</sup> |
| SBP03              | 2.13 (0.06) <sup>c</sup>                     | -0.021 (0.022)                            | 0.00                            | 0.307 (0.060) <sup>c</sup>              | -0.024 (0.018)                                  | 0.019 (0.009) <sup>a</sup>          | 0.201 (0.019) <sup>c</sup> |
| SBP04              | 2.36 (0.06) <sup>c</sup>                     | -0.067 (0.024) <sup>b</sup>               | 0.02                            | 0.277 (0.057) <sup>c</sup>              | -0.027 (0.019)                                  | 0.025 (0.010) <sup>b</sup>          | 0.213 (0.020) <sup>c</sup> |
| PBLI01             | 2.38 (0.06) <sup>c</sup>                     | -0.066 (0.026) <sup>a</sup>               | 0.02                            | 0.288 (0.067) <sup>c</sup>              | -0.020 (0.022)                                  | 0.020 (0.011) <sup>a</sup>          | 0.289 (0.027) <sup>c</sup> |
| PBLI02             | 2.23 (0.07) <sup>c</sup>                     | -0.048 (0.026)                            | 0.01                            | 0.339 (0.065) <sup>c</sup>              | -0.050 (0.022) <sup>a</sup>                     | 0.035 (0.011) <sup>c</sup>          | 0.218 (0.020) <sup>c</sup> |
| PBLI03             | 2.19 (0.06) <sup>c</sup>                     | -0.066 (0.026) <sup>a</sup>               | 0.01                            | 0.313 (0.062) <sup>c</sup>              | -0.043 (0.021) <sup>a</sup>                     | 0.035 (0.011) <sup>c</sup>          | 0.216 (0.020) <sup>c</sup> |
| PBLI04             | 2.11 (0.07) <sup>c</sup>                     | -0.051 (0.026)                            | 0.01                            | 0.342 (0.067) <sup>c</sup>              | -0.045 (0.022) <sup>a</sup>                     | 0.034 (0.011) <sup>b</sup>          | 0.233 (0.021) <sup>c</sup> |
| PBLI05             | 2.08 (0.07) <sup>c</sup>                     | -0.064 (0.025) <sup>a</sup>               | 0.01                            | 0.366 (0.066) <sup>c</sup>              | -0.054 (0.021) <sup>b</sup>                     | 0.035 (0.010) <sup>c</sup>          | 0.185 (0.017) <sup>c</sup> |
| PBLI06             | 2.04 (0.07) <sup>c</sup>                     | -0.038 (0.024)                            | 0.01                            | 0.353 (0.071) <sup>c</sup>              | -0.036 (0.022)                                  | 0.020 (0.010) <sup>a</sup>          | 0.252 (0.023) <sup>c</sup> |
| PBLI07             | 2.17 (0.06) <sup>c</sup>                     | -0.061 (0.025) <sup>a</sup>               | 0.01                            | 0.265 (0.056) <sup>c</sup>              | -0.033 (0.019)                                  | 0.029 (0.010) <sup>b</sup>          | 0.217 (0.020) <sup>c</sup> |
| PROF01             | 2.70 (0.07) <sup>c</sup>                     | -0.061 (0.031)                            | 0.01                            | 0.438 (0.093) <sup>c</sup>              | -0.028 (0.030)                                  | 0.041 (0.016) <sup>b</sup>          | 0.359 (0.033) <sup>c</sup> |
| PROF02             | 2.77 (0.07) <sup>c</sup>                     | -0.075 (0.029) <sup>a</sup>               | 0.01                            | 0.368 (0.080) <sup>c</sup>              | -0.011 (0.026)                                  | 0.038 (0.014) <sup>b</sup>          | 0.318 (0.029) <sup>c</sup> |
| PROF03             | 2.68 (0.07) <sup>c</sup>                     | -0.060 (0.029) <sup>a</sup>               | 0.01                            | 0.356 (0.080) <sup>c</sup>              | -0.014 (0.027)                                  | 0.034 (0.015) <sup>b</sup>          | 0.338 (0.031) <sup>c</sup> |
| PROF04             | 2.86 (0.07) <sup>c</sup>                     | -0.081 (0.029) <sup>b</sup>               | 0.02                            | 0.390 (0.081) <sup>c</sup>              | -0.001 (0.026)                                  | 0.040 (0.014) <sup>b</sup>          | 0.302 (0.028) <sup>c</sup> |
| PROF05             | 2.61 (0.07) <sup>c</sup>                     | -0.051 (0.030)                            | 0.01                            | 0.354 (0.079) <sup>c</sup>              | -0.024 (0.027)                                  | 0.042 (0.015) <sup>b</sup>          | 0.333 (0.031) <sup>c</sup> |
| PROF06             | 2.87 (0.07) <sup>c</sup>                     | -0.081 (0.030) <sup>b</sup>               | 0.02                            | 0.433 (0.086) <sup>c</sup>              | -0.011 (0.027)                                  | 0.047 (0.015) <sup>c</sup>          | 0.304 (0.028) <sup>c</sup> |
| ICS01              | 2.38 (0.06) <sup>c</sup>                     | -0.035 (0.026)                            | 0.00                            | 0.274 (0.061) <sup>c</sup>              | -0.021 (0.021)                                  | 0.026 (0.011) <sup>a</sup>          | 0.256 (0.024) <sup>c</sup> |
| ICS02              | 2.30 (0.07) <sup>c</sup>                     | -0.036 (0.026)                            | 0.00                            | 0.367 (0.070) <sup>c</sup>              | -0.047 (0.022) <sup>a</sup>                     | 0.035 (0.011) <sup>c</sup>          | 0.224 (0.021) <sup>c</sup> |
| ICS03              | 2.33 (0.06) <sup>c</sup>                     | -0.046 (0.025)                            | 0.01                            | 0.278 (0.062) <sup>c</sup>              | -0.018 (0.021)                                  | 0.023 (0.011) <sup>a</sup>          | 0.262 (0.024) <sup>c</sup> |
| ICS04              | 2.43 (0.07) <sup>c</sup>                     | -0.061 (0.029) <sup>a</sup>               | 0.01                            | 0.324 (0.073) <sup>c</sup>              | -0.038 (0.026)                                  | 0.034 (0.014) <sup>b</sup>          | 0.311 (0.029) <sup>c</sup> |
| ICS05              | 2.25 (0.06) <sup>c</sup>                     | -0.034 (0.025)                            | 0.01                            | 0.267 (0.061) <sup>c</sup>              | -0.013 (0.020)                                  | 0.019 (0.010) <sup>a</sup>          | 0.260 (0.024) <sup>c</sup> |

Abbreviations: CCC indicates clinical competency committee; ACGME, Accreditation Council for Graduate Medical Education; time 0, December 2013; SE, standard error; PC, patient care (the results for the PC subcompetencies are not reported here because the milestone language

Supplemental digital content for Hamstra SJ, Yamazaki K, Barton MA, Santen SA, Beeson MS, Holmboe ES. A national study of longitudinal consistency in ACGME milestone ratings by clinical competency committees: Exploring an aspect of validity in the assessment of residents' competence. Acad Med.

for urology was modified prior to the end of the study period); MK, medical knowledge (the results for the MK subcompetencies are not reported here because the milestone language for urology was modified prior to the end of the study period); SBP, systems-based practice; PBLI, practice-based learning and improvement; PROF, professionalism; ICS, interpersonal and communication skills.

<sup>a</sup> $P < .05$ .

<sup>b</sup> $P < .01$ .

<sup>c</sup> $P < .001$ .
