# Supplementary material for: A National Study of Longitudinal Consistency in ACGME Milestone Ratings by Clinical Competency Committees: Exploring an Aspect of Validity in the Assessment of Residents’ Competence
Source: PubMed Central journal article supplement — Acad Med. 2019 Jun 4;94(10):1522–31. doi: 10.1097/ACM.0000000000002820 (PMC6760653; doi:10.1097/acm.0000000000002820), 2019-06-04

Supplemental digital content for Hamstra SJ, Yamazaki K, Barton MA, Santen SA, Beeson MS, Holmboe ES. A national study of longitudinal consistency in ACGME milestone ratings by clinical competency committees: Exploring an aspect of validity in the assessment of residents' competence. *Acad Med*.

## **Supplemental Digital Appendixes 3–5**

### Supplemental Digital Appendix 3

Full Version of Figure 1 (See Figure Legend in Main Text for More Information)

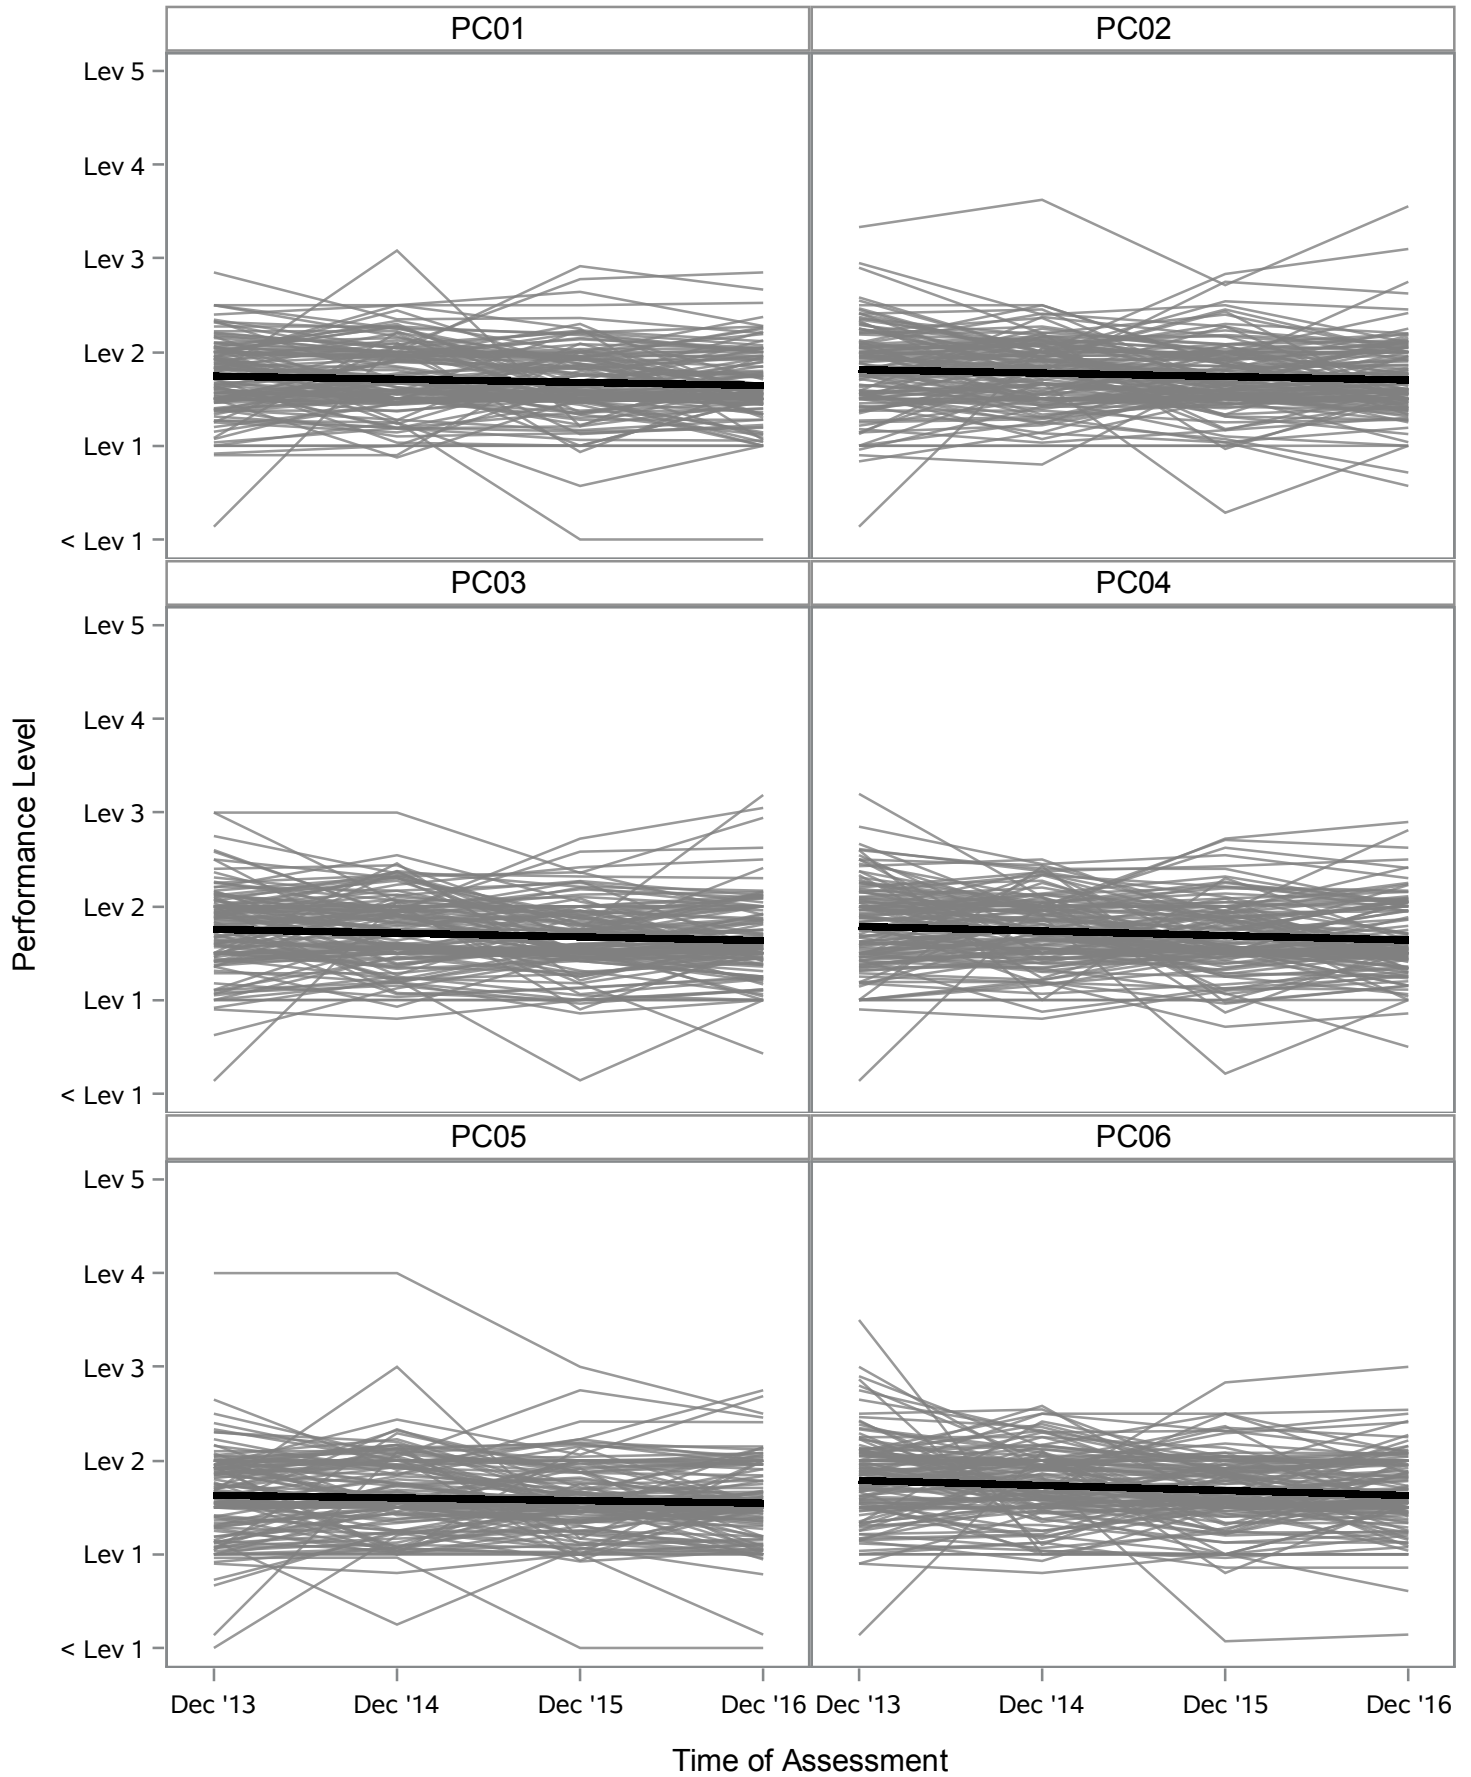

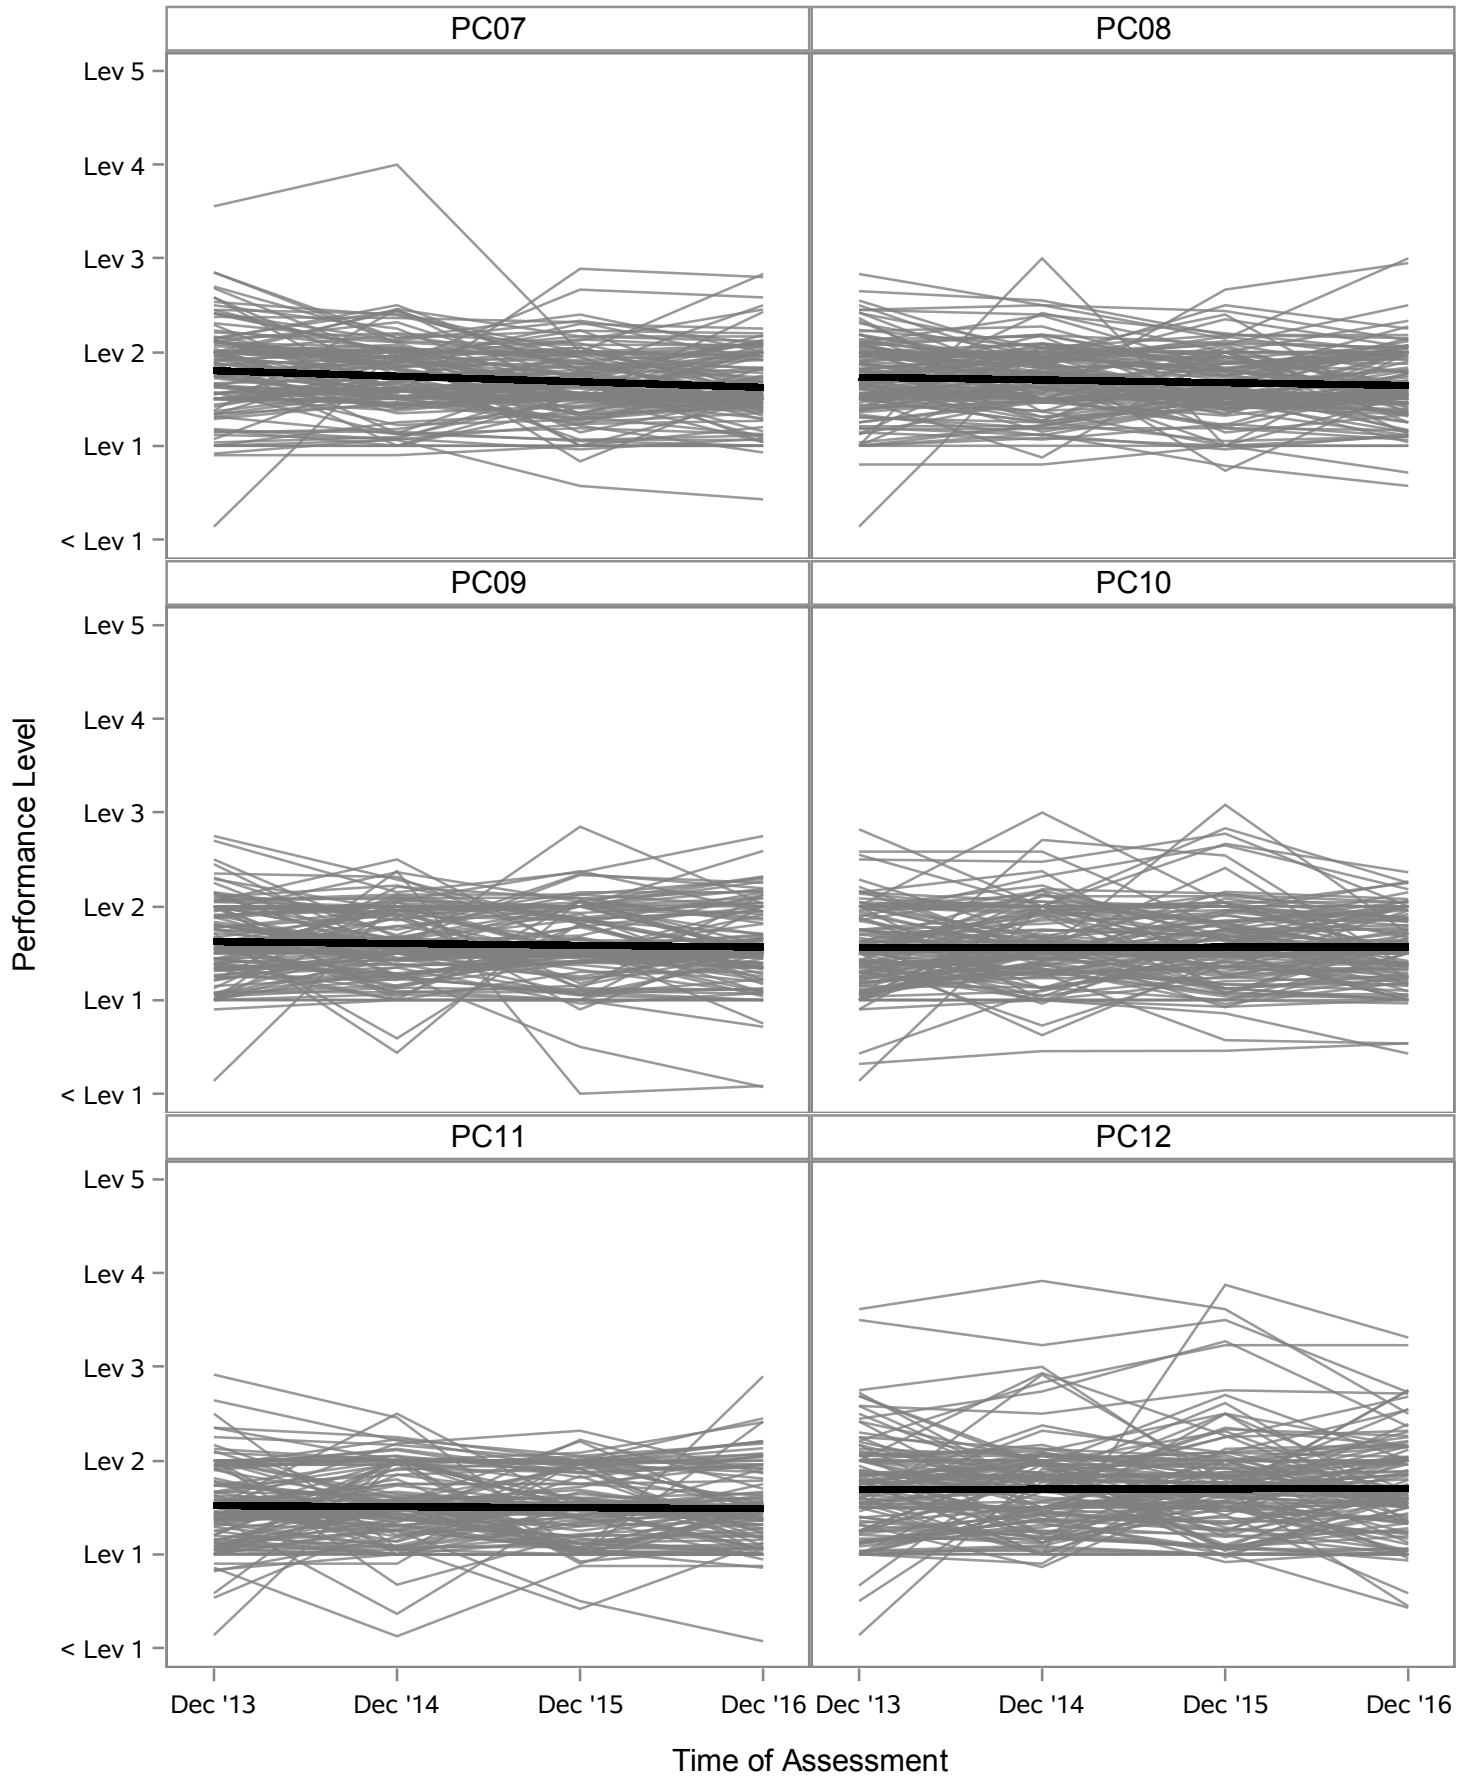

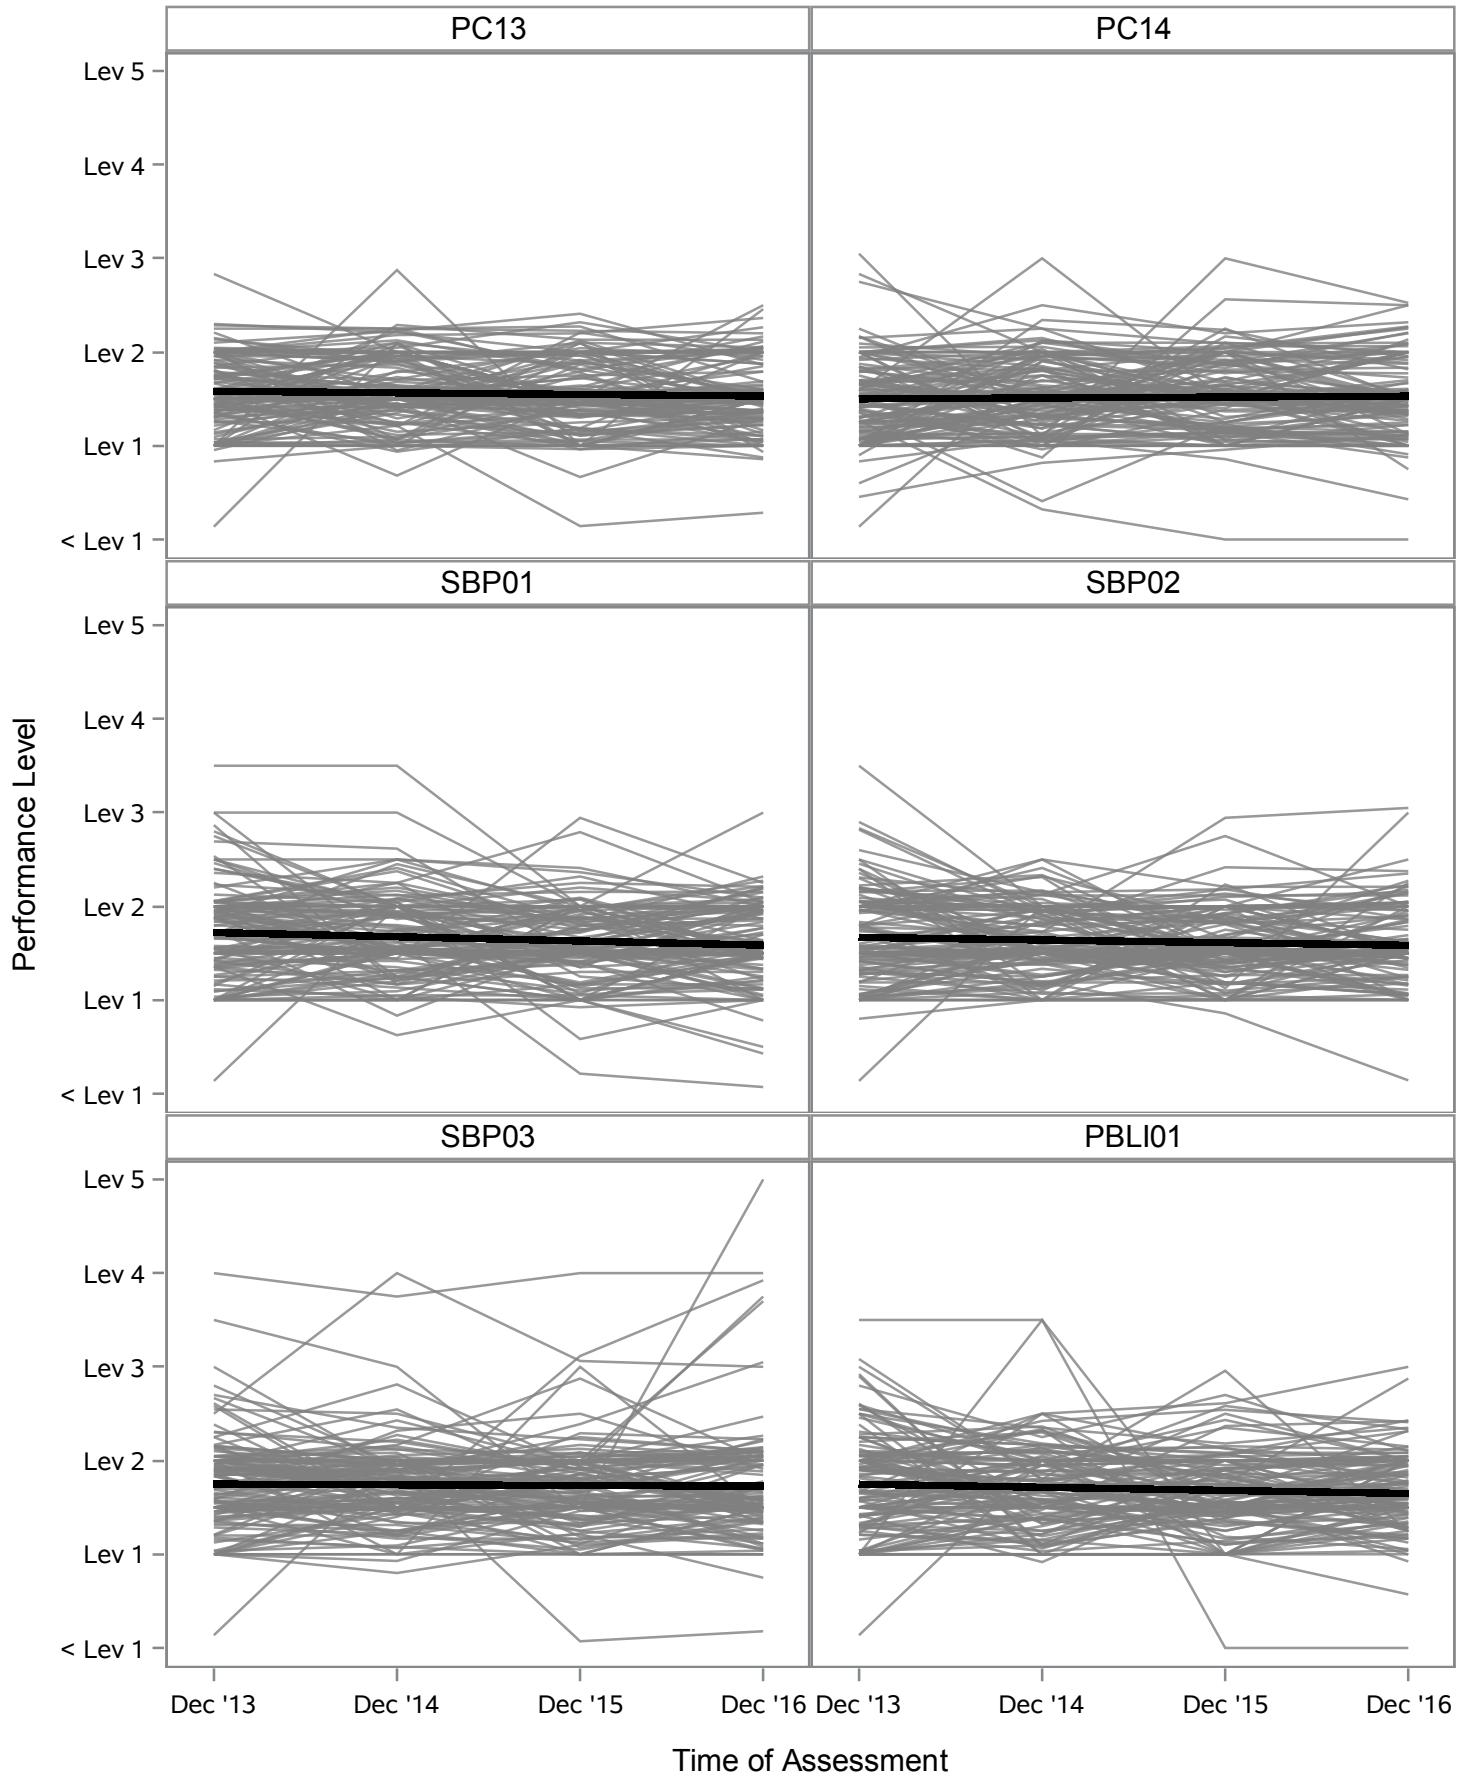

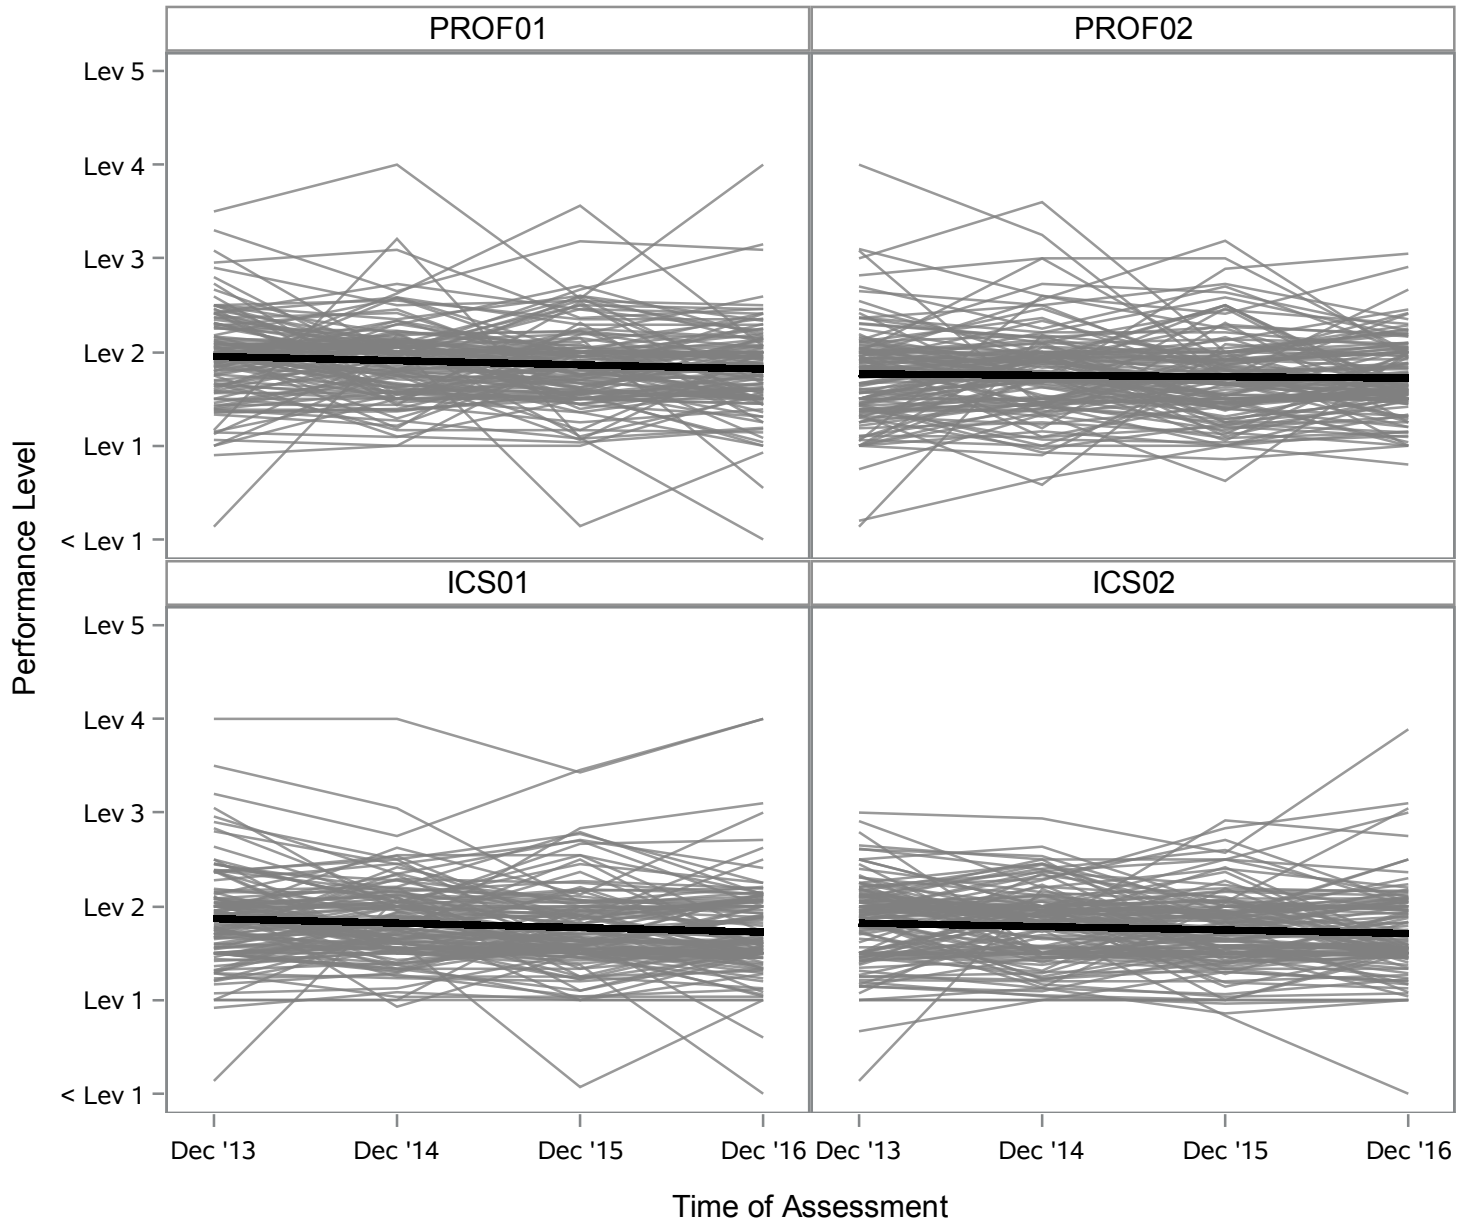

# Supplemental Digital Appendix 4

Full Version of Figure 2 (See Figure Legend in Main Text for More Information)

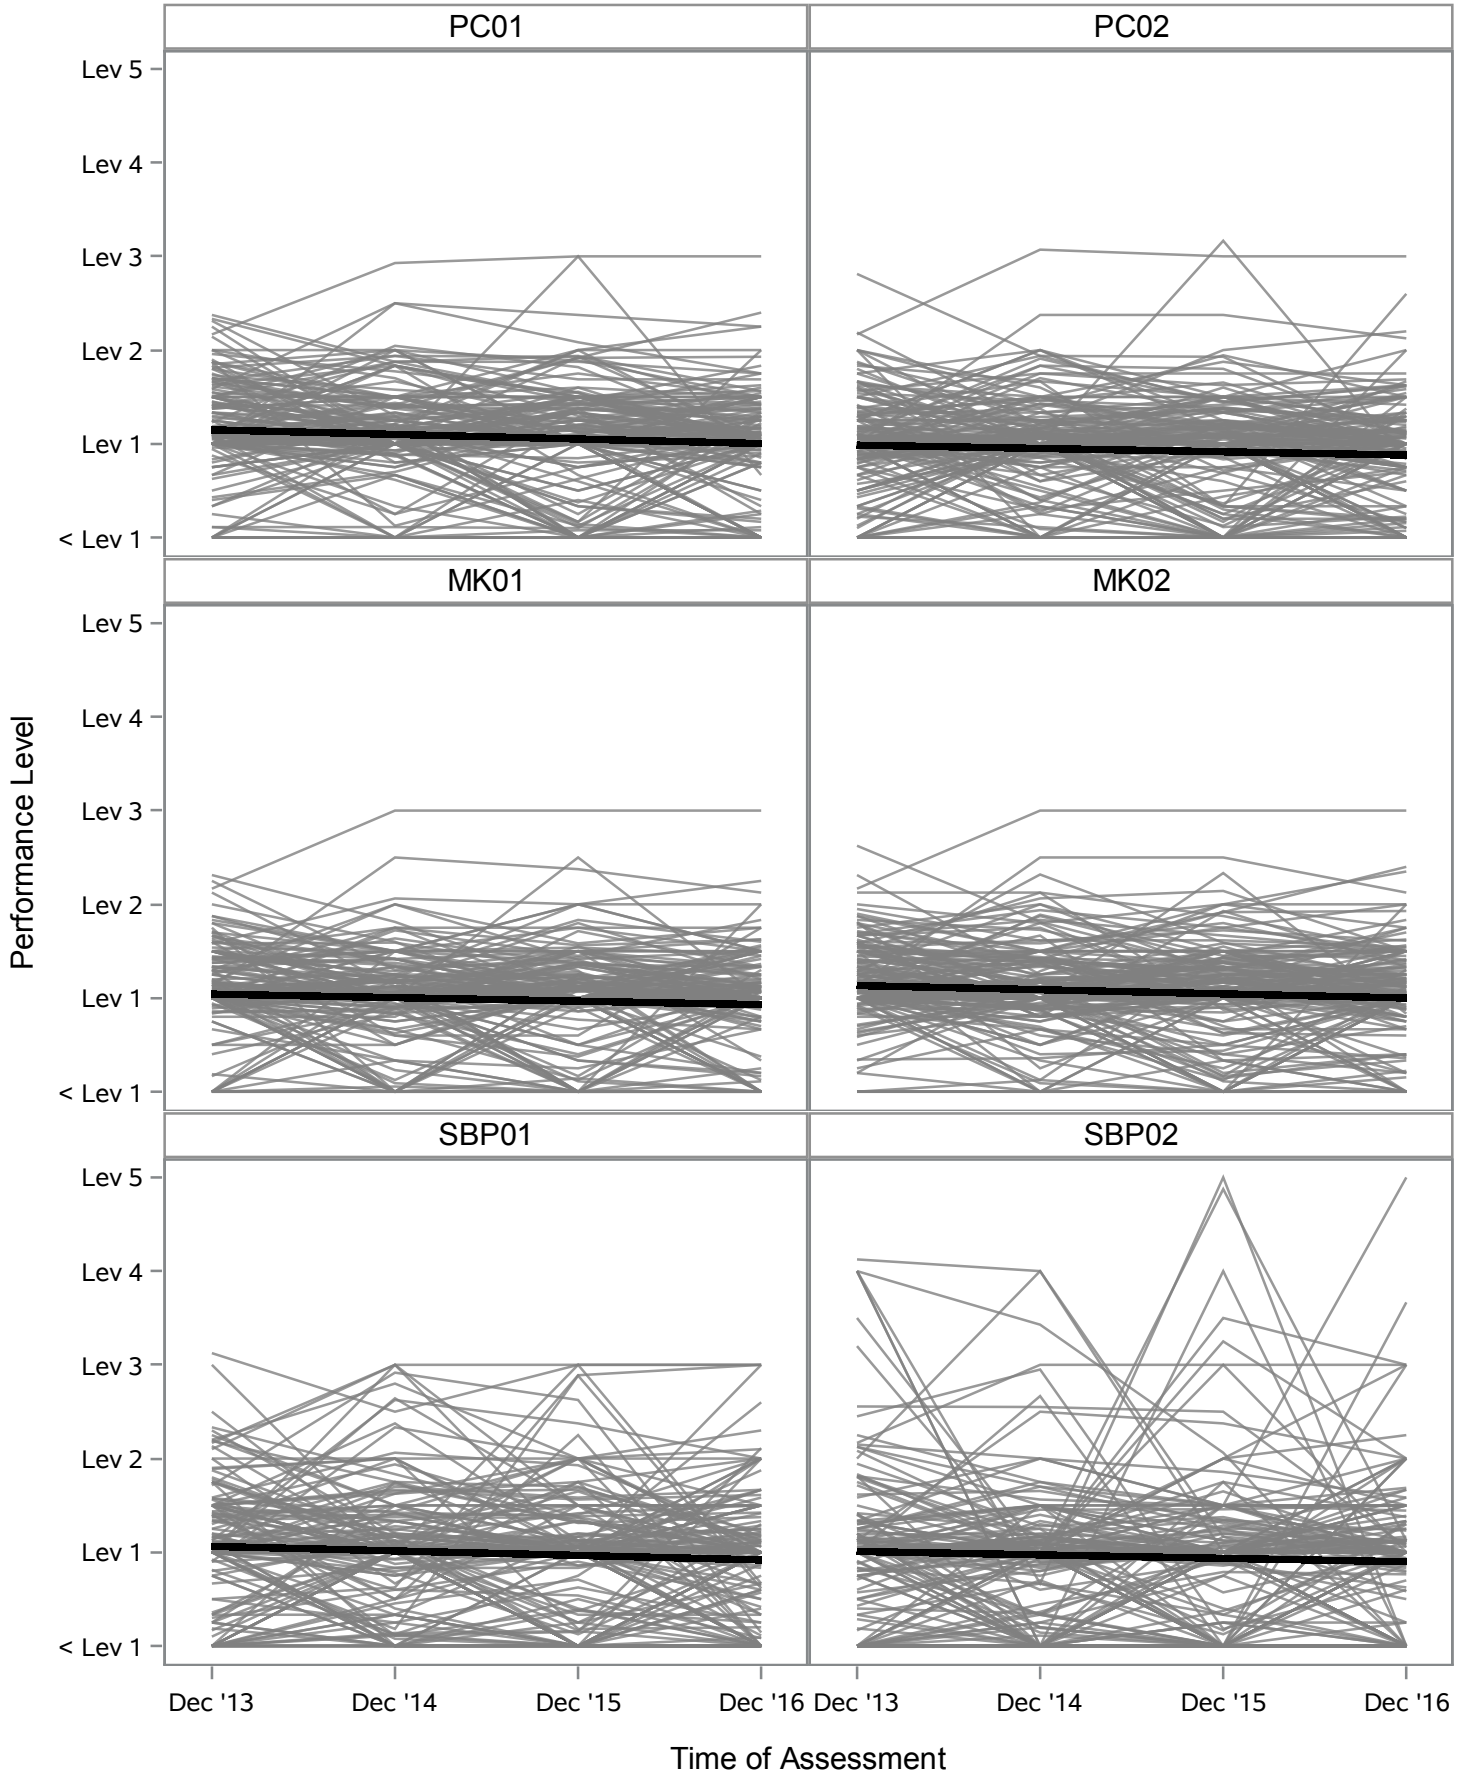

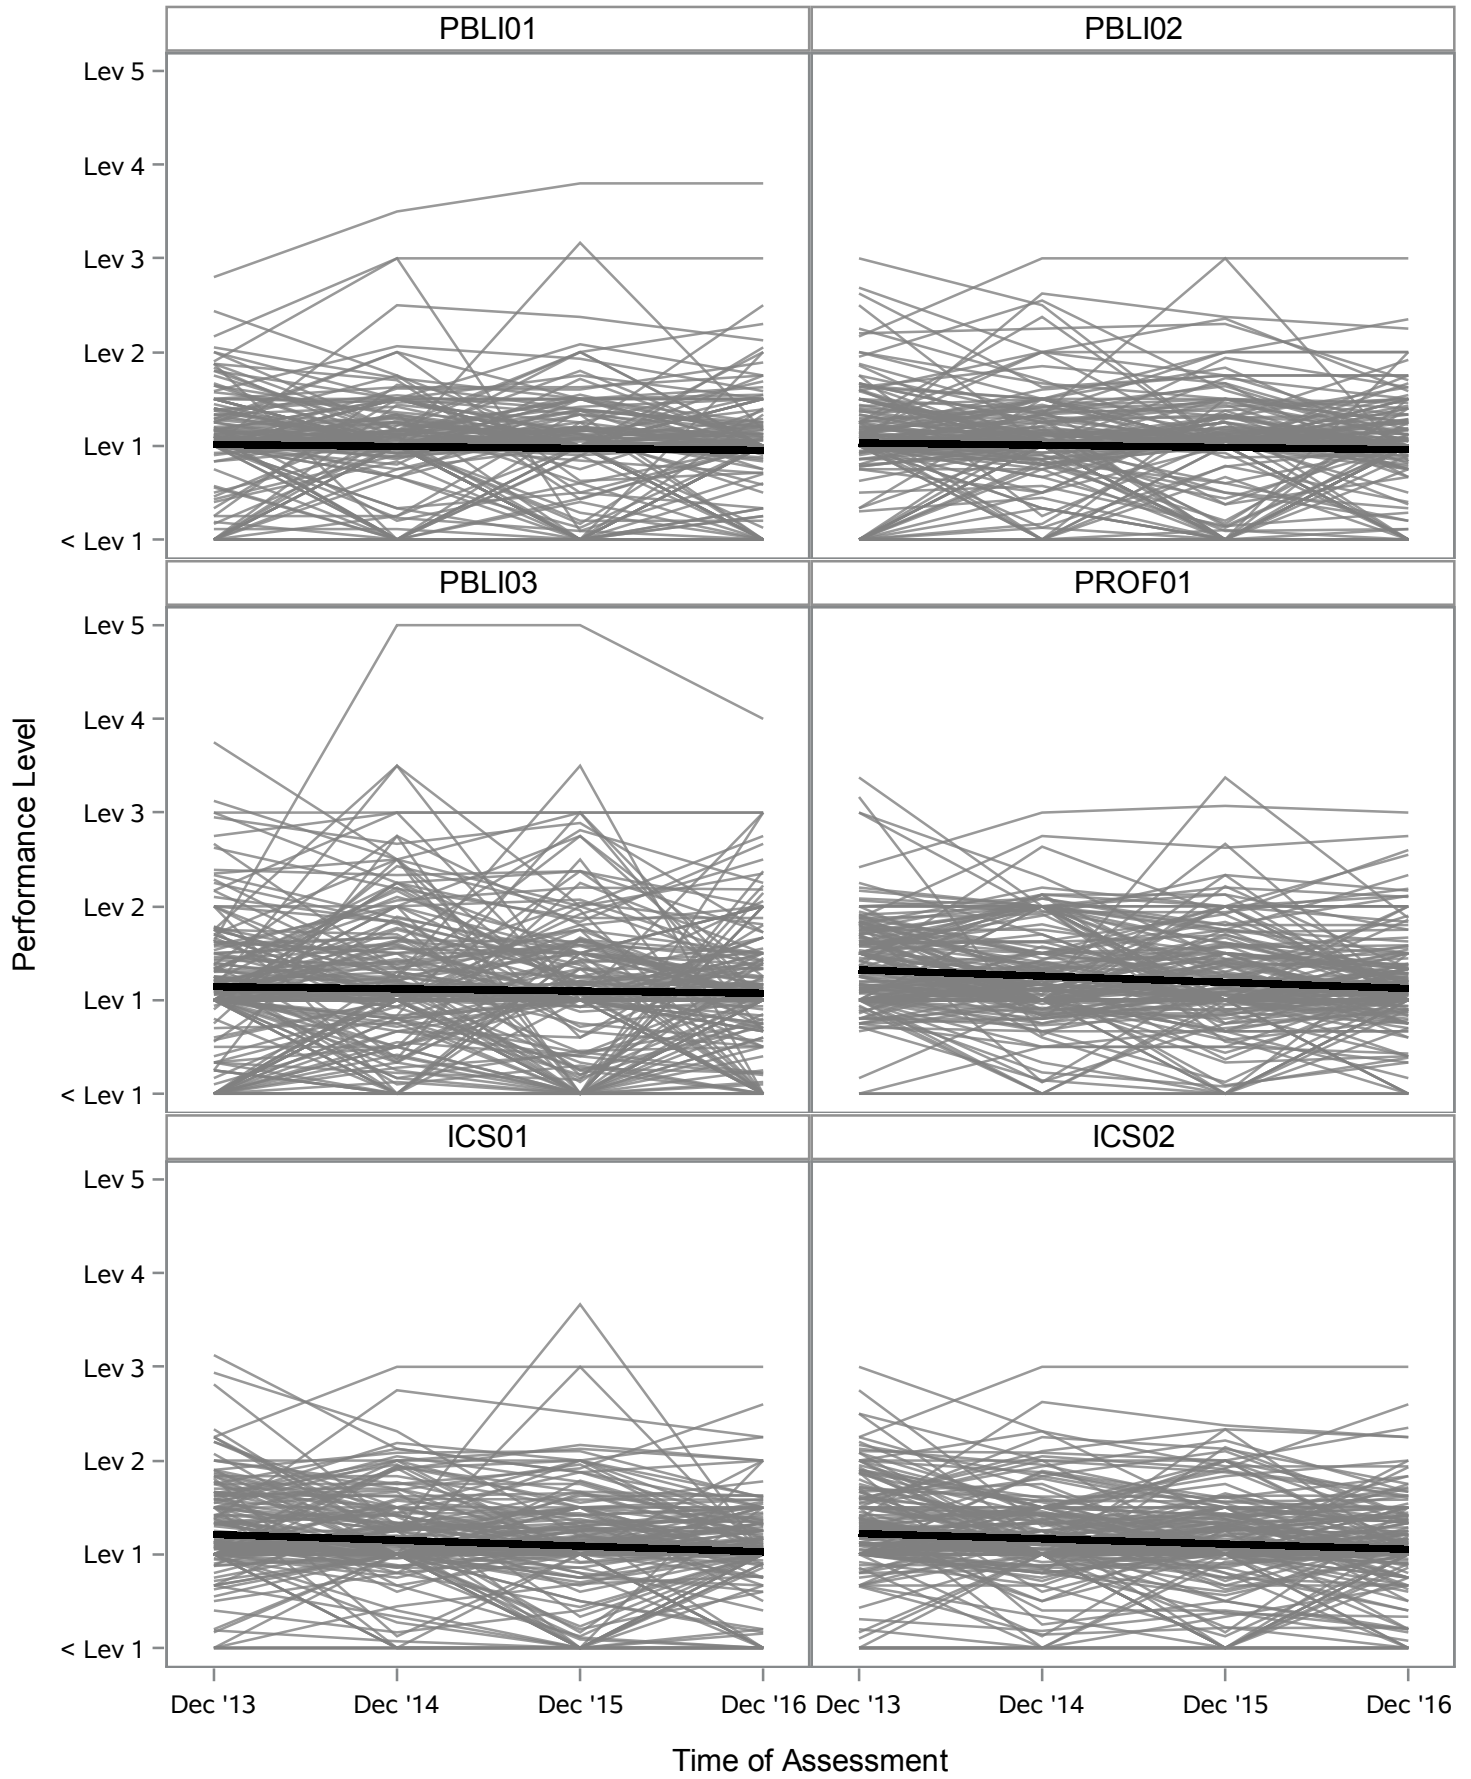

# Supplemental Digital Appendix 5

Full Version of Figure 3 (See Figure Legend in Main Text for More Information)

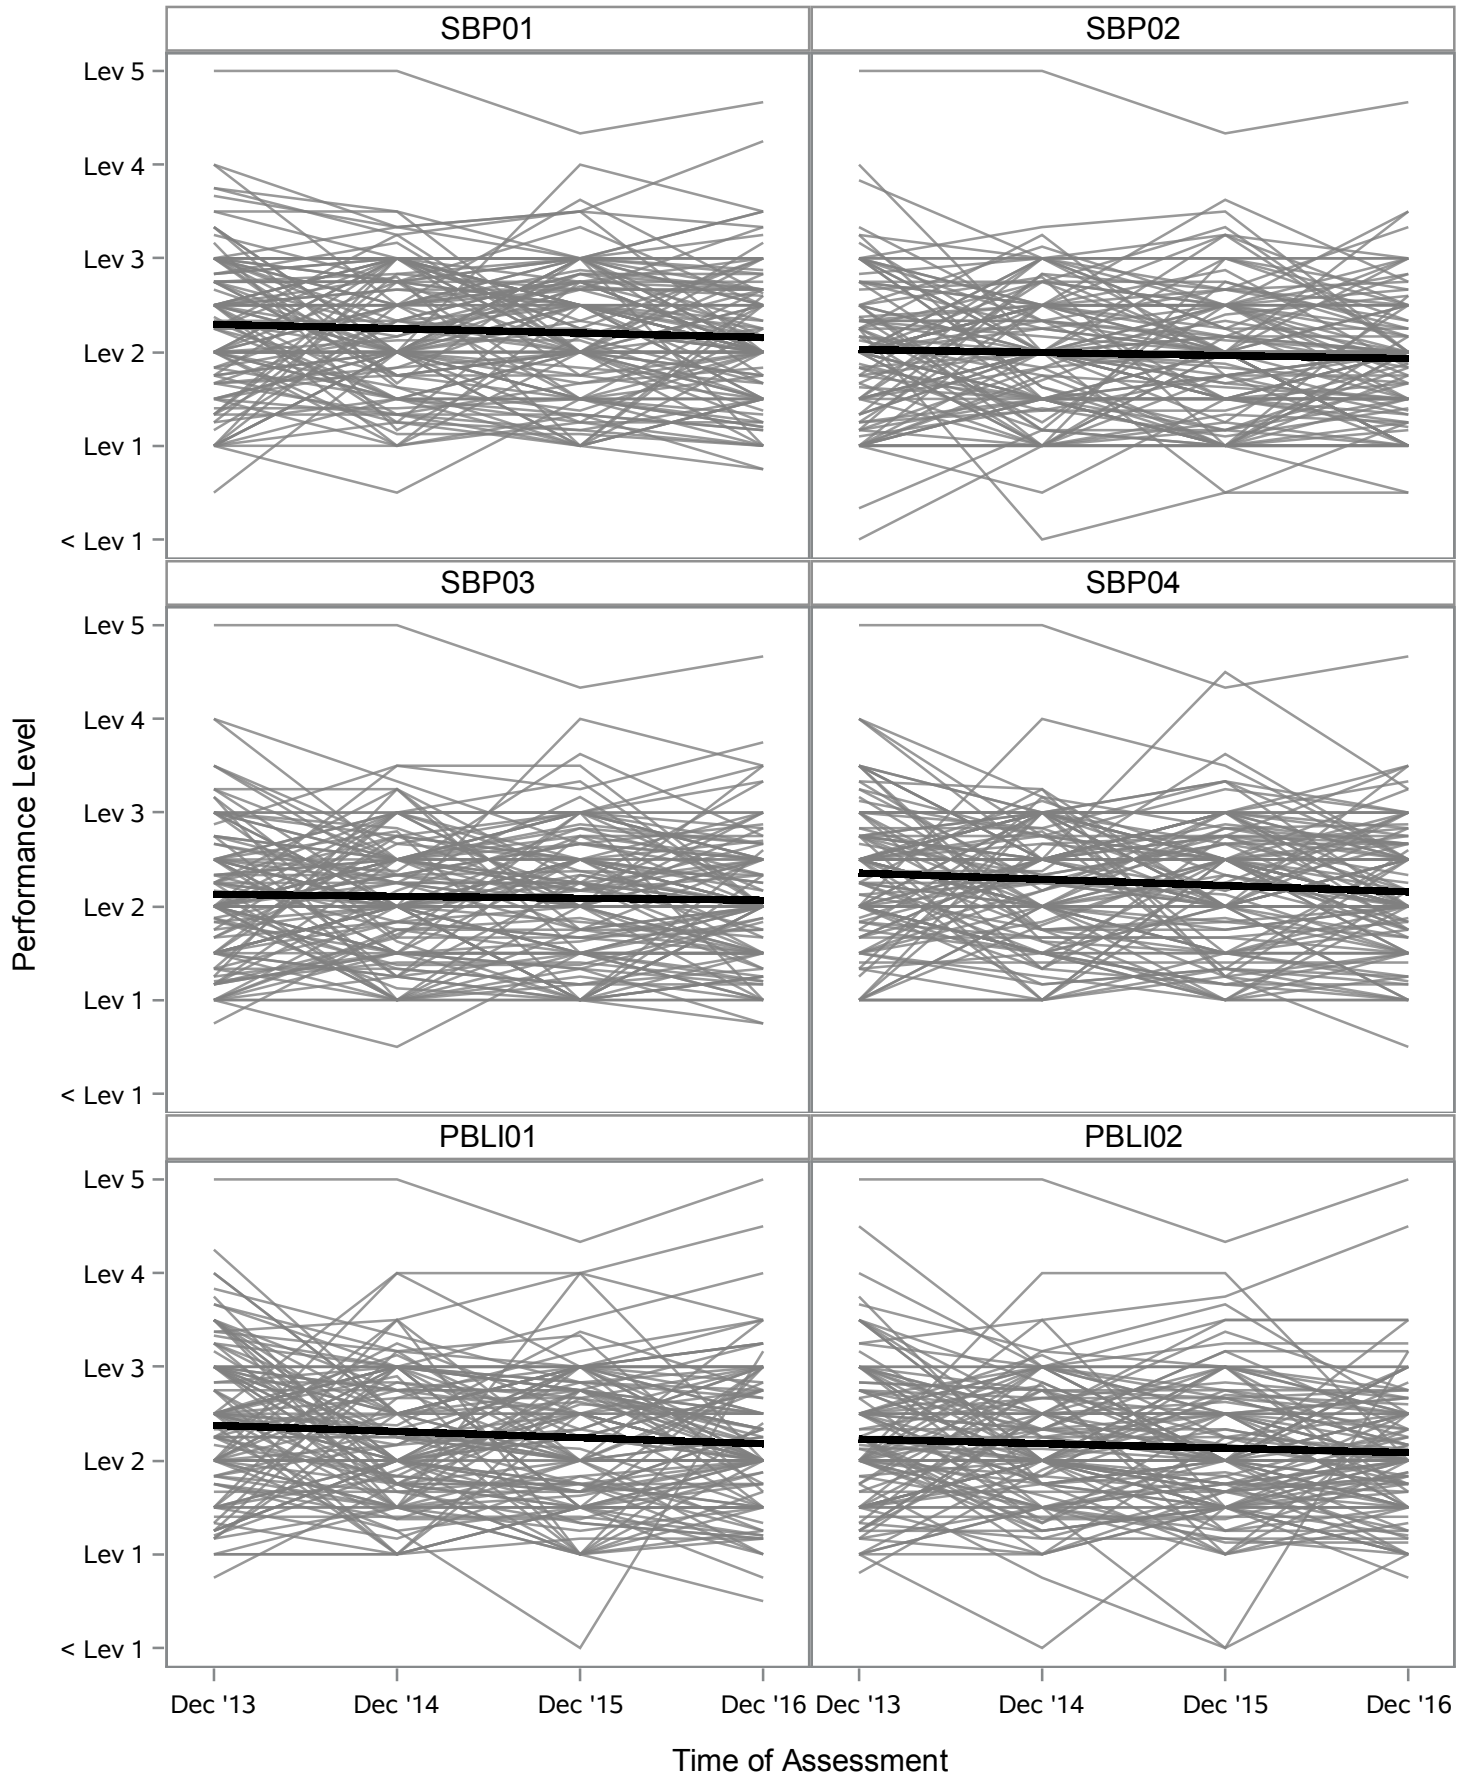



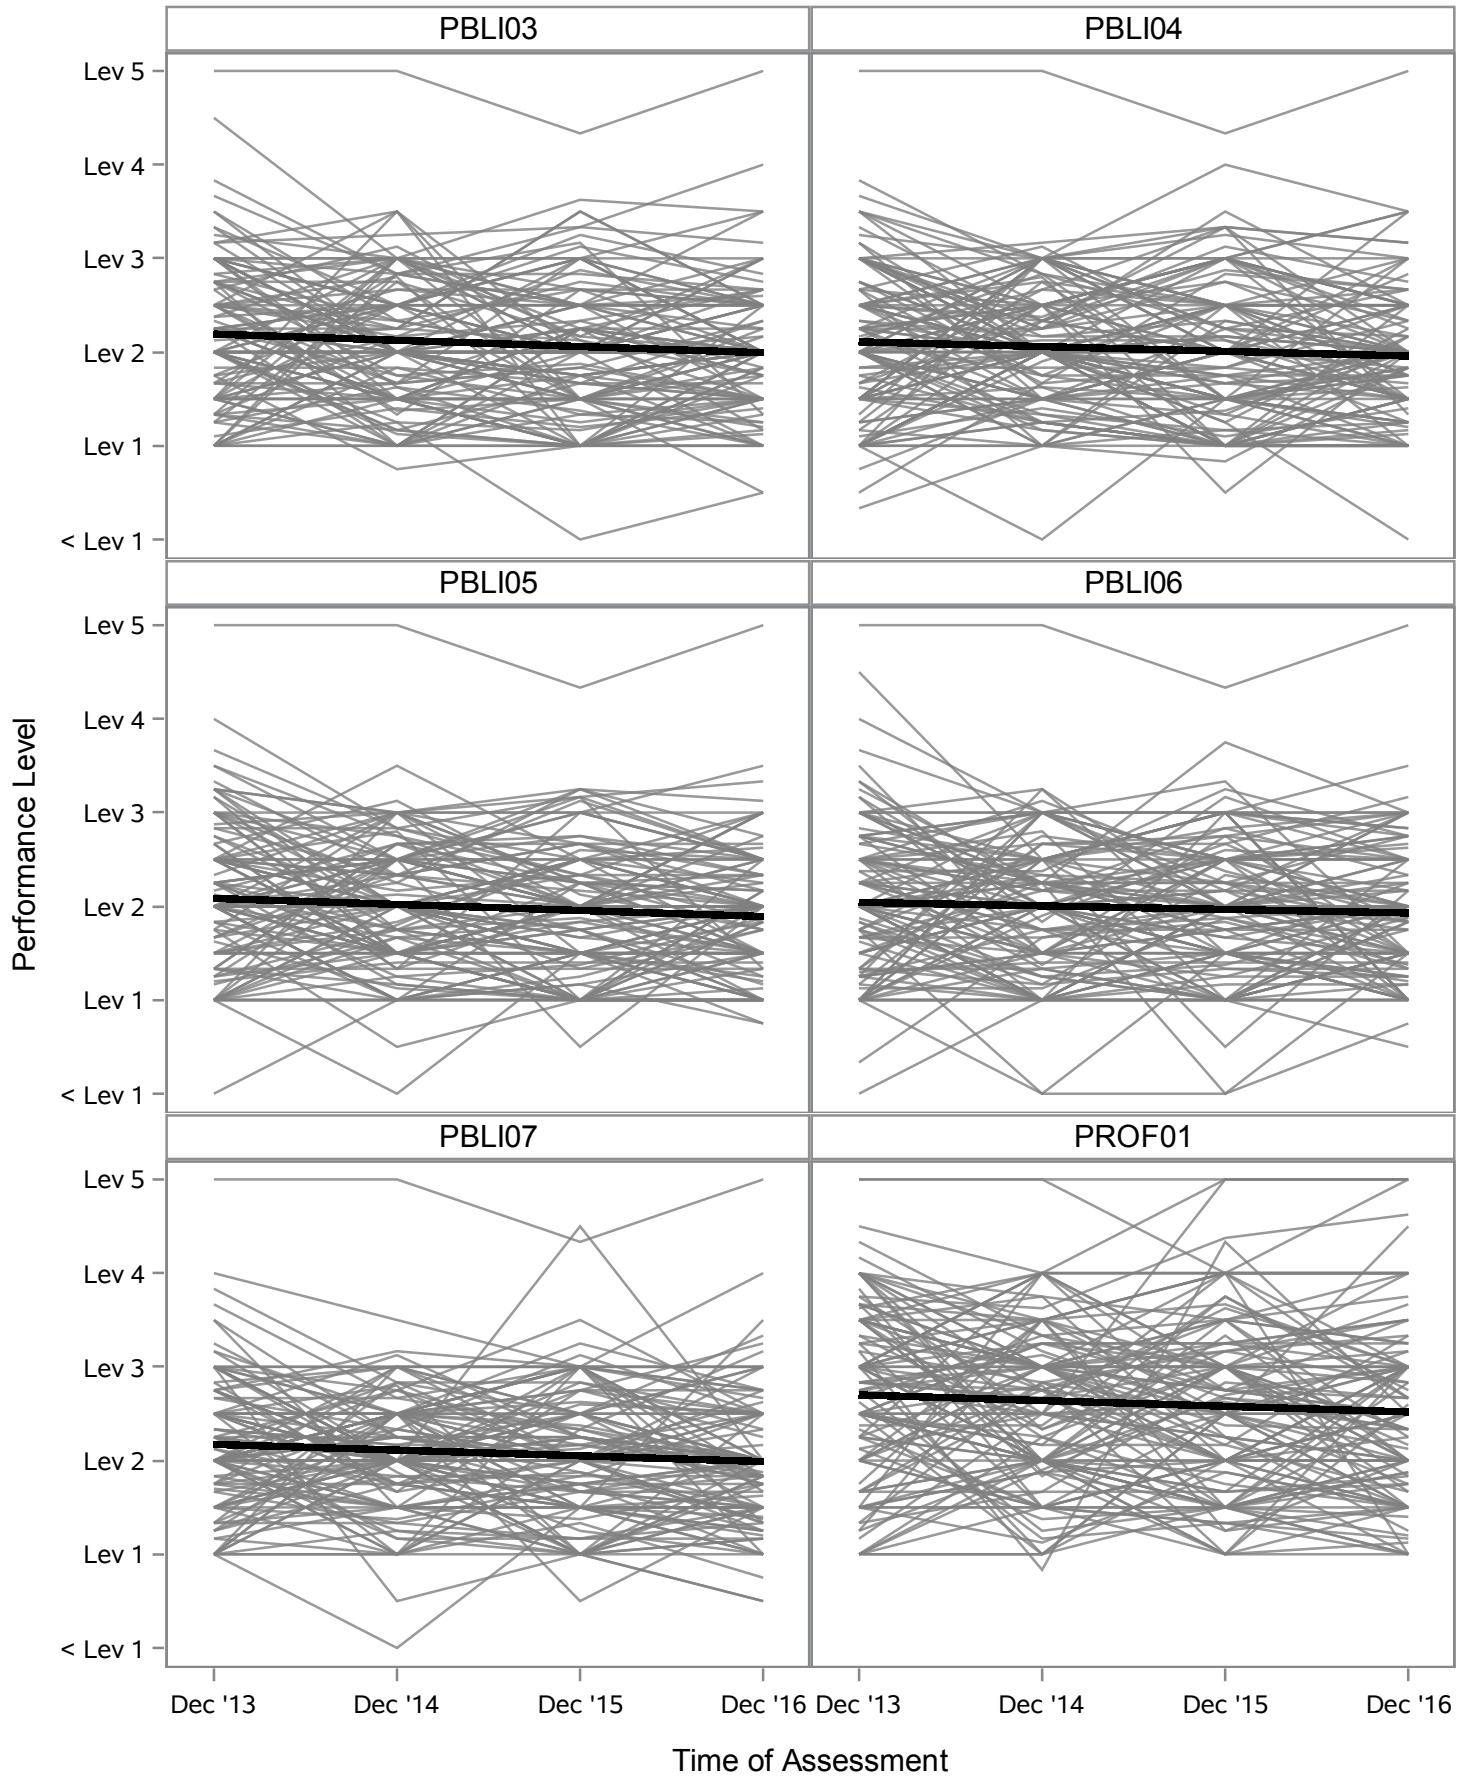

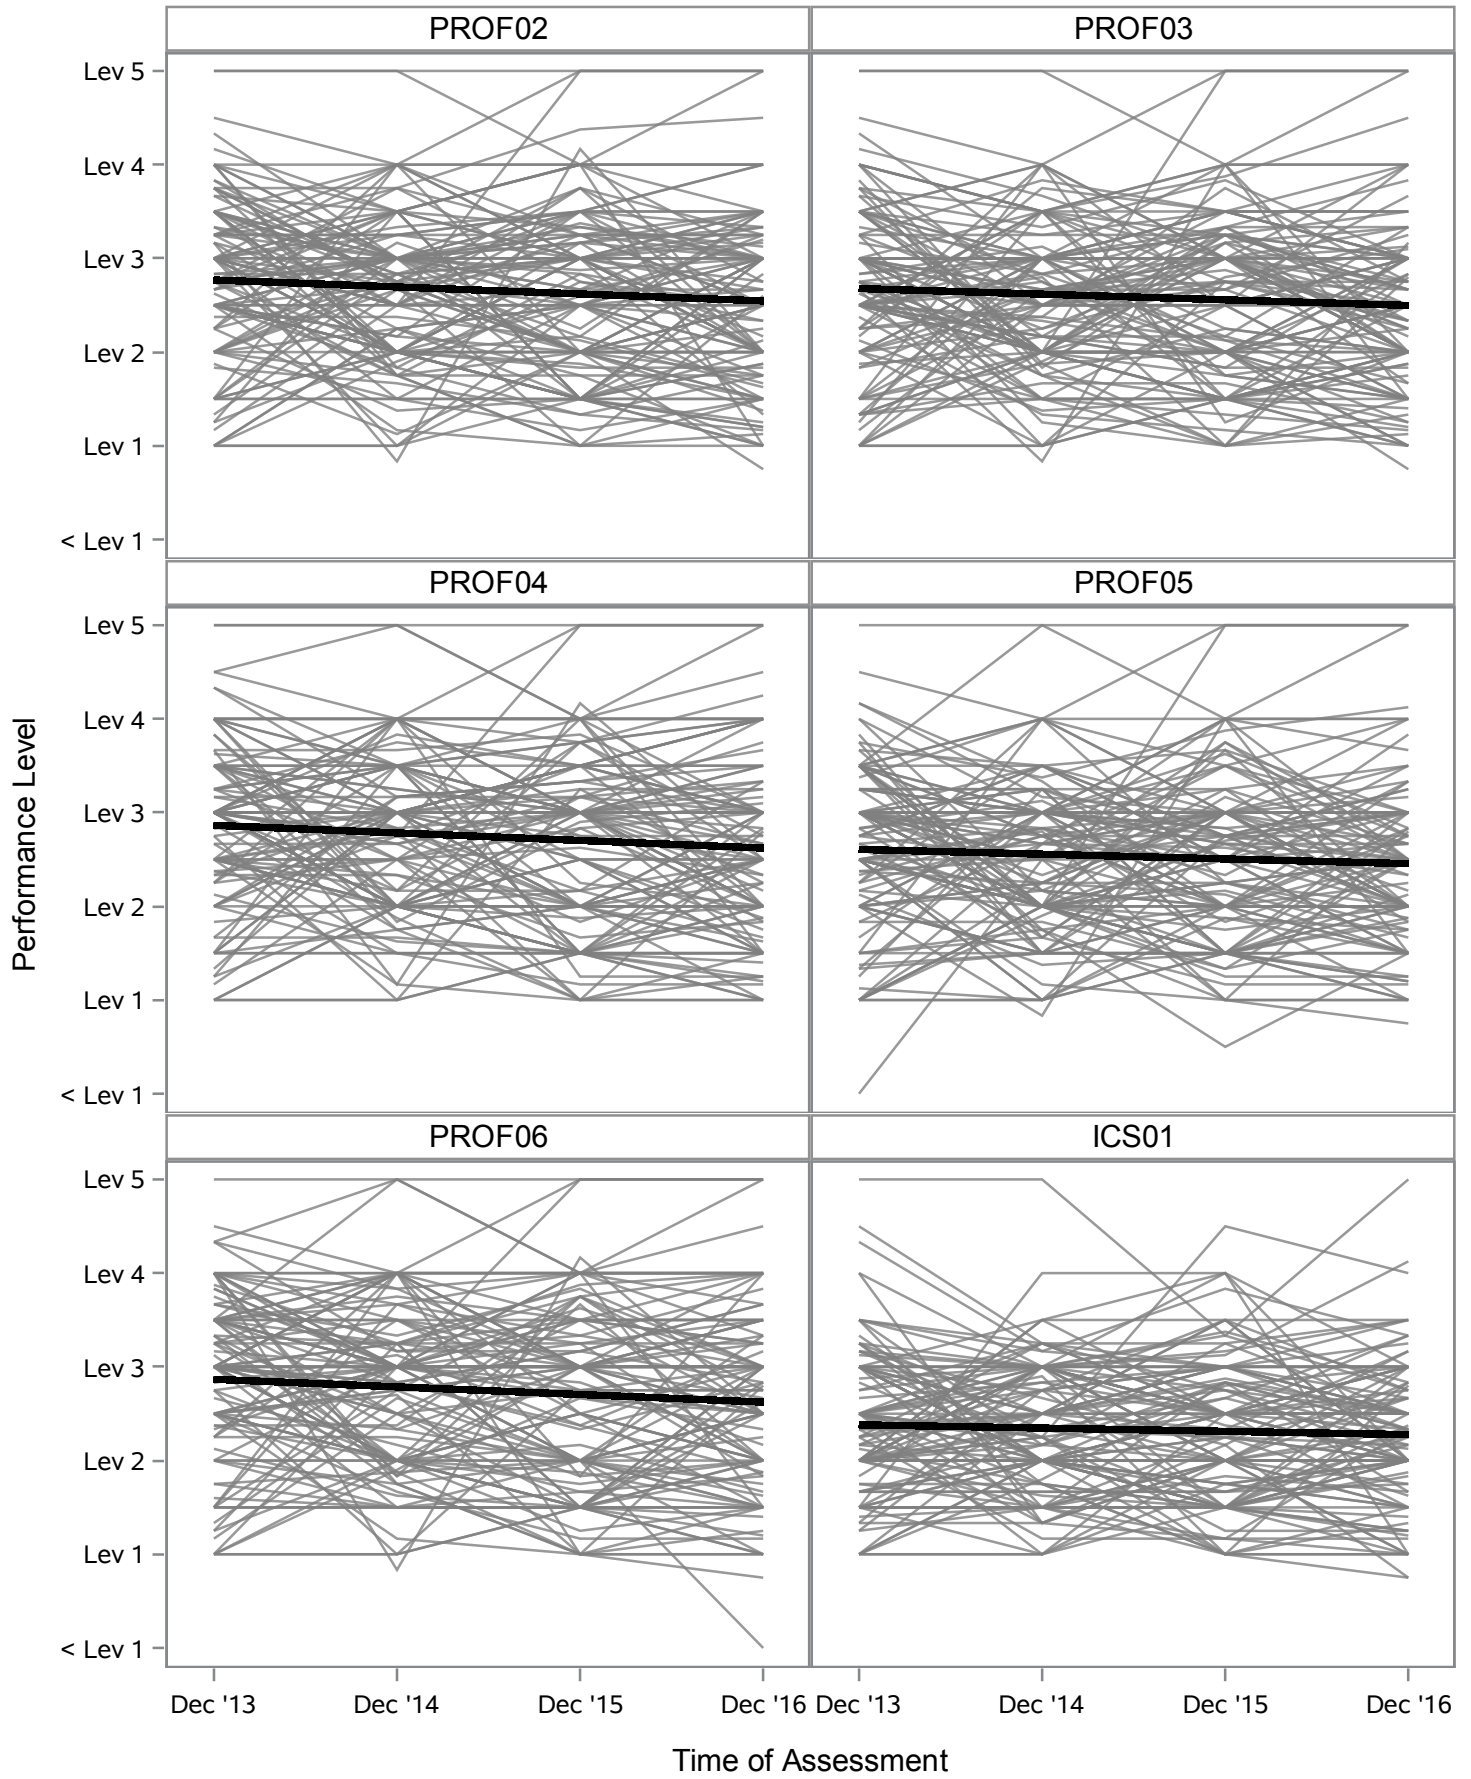

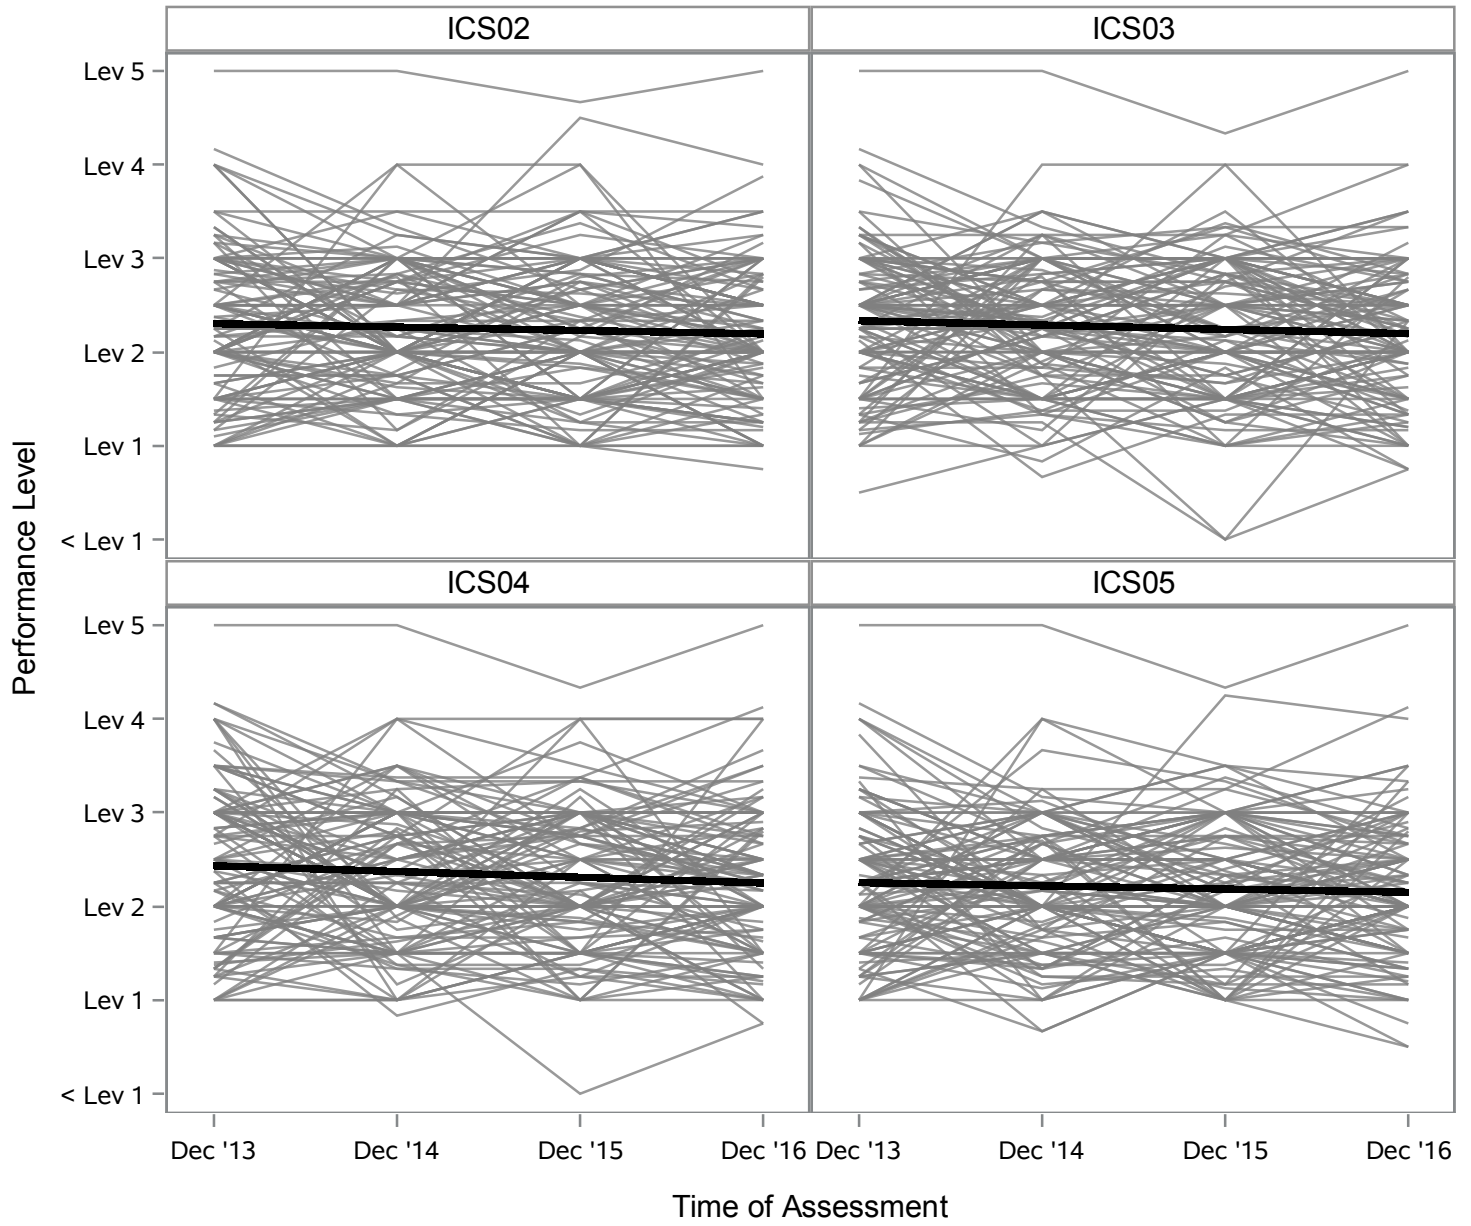

Supplement: acm-94-1522-s002.pdf [file acm-94-1522-s002.pdf]
